# Supplementary material for: A biosynthesis pathway for 3-hydroxypropionic acid production in genetically engineered Saccharomyces cerevisiae
Source: Royal Society of Chemistry journal article supplement (doi:10.1039/d0gc04431h), 2021-01-01
Supplement: d0gc04431h1.pdf [file d0gc04431h1.pdf]

## 1 **Supplementary materials**

### 2 **A biosynthesis pathway for 3-hydroxypropionic acid production in** 3 **genetically engineered *Saccharomyces cerevisiae***

4 Tian Tong<sup>a</sup>, Zhenyan Tao<sup>b,c,d</sup>, Xiulai Chen<sup>b,c,d</sup>, Cong Gao<sup>b,c,d</sup>, Hui Liu<sup>b,c,d</sup>, Gao-Qiang Liu<sup>a,\*</sup> and  
5 Liming Liu<sup>b,c,d,\*</sup>

6 <sup>a</sup>*Hunan Provincial Key Laboratory for Forestry Biotechnology and International Cooperation Base*  
7 *of Science and Technology Innovation on Forest Resource Biotechnology, Central South University of*  
8 *Forestry and Technology, Changsha 410004, China*

9 <sup>b</sup>*State Key Laboratory of Food Science and Technology, Jiangnan University, Wuxi 214122, China*

10 <sup>c</sup>*Key Laboratory of Industrial Biotechnology, Ministry of Education, Jiangnan University, Wuxi*  
11 *214122, China*

12 <sup>d</sup>*International Joint Laboratory on Food Safety, Jiangnan University, Wuxi 214122, China*

13 \*Corresponding author: Hunan Provincial Key Laboratory for Forestry Biotechnology, Central South  
14 University of Forestry and Technology, 498 South Shaoshan Road, Changsha 410004, China. *E-mail*  
15 *address*: gaoliuedu@csuft.edu.cn (Gao-Qiang Liu).

16 State Key Laboratory of Food Science and Technology, Jiangnan University, 1800 Lihu Road, Wuxi  
17 214122, China. *E-mail address*: mingll@jiangnan.edu.cn (Liming Liu).

18 This file includes:

19 Supplementary Fig. 1 to Supplementary Fig. 12

20 Supplementary Table 1 to Supplementary Table 5

21 Supplementary Note 1 to Supplementary Note 5

22 Supplementary Experimental 1 to Supplementary Experimental 8

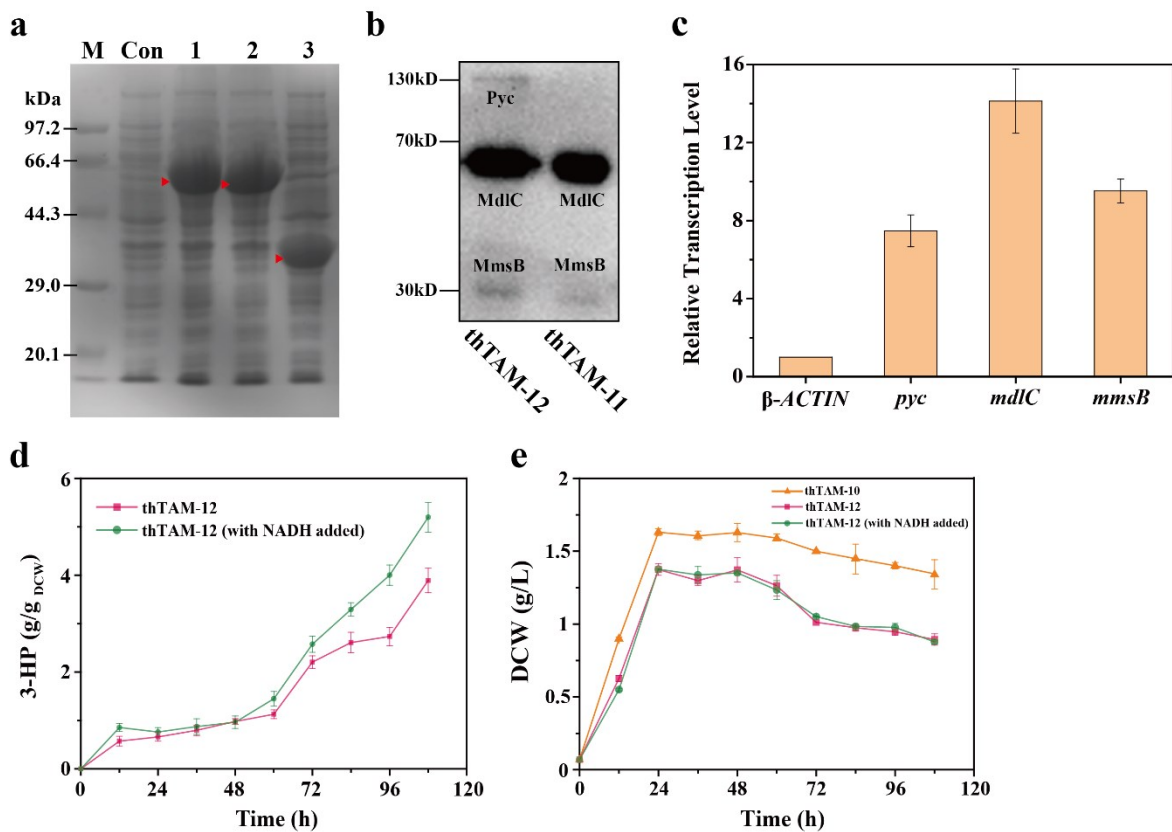

**Fig. 1.** (a) The SDS-PAGE verifies the enzymes expression in *E. coli* BL21-2, BL21-3, and BL21-4. M, represents protein standard molecular weight marker; Con, represents protein in control strain BL21-1 (harboring an empty plasmid pET28a); Lane 1, represents protein in strain BL21-2 (harboring pET28a-*kdcA*); Lane 2, represents protein in strain BL21-3 (harboring pET28a-*mdlC*); Lane 3, represents protein in strain BL21-4 (harboring pET28a-*mmsB*). Since protein expressed by plasmid pET28a respectively introduces His tag and spacer amino acids at the C- and N-terminal, the expected sizes of overexpressed proteins are: KdcA, 60.9 kDa; MdlC, 61.0 kDa; MmsB, 35.9 kDa. (b) Western blot analysis of strains thTAM-12 (strain thTAM overexpressing genes *pyc*, *mdlC*, and *mmsB*. Pyc, 131.2 kDa; MdlC, 56.4 kDa; MmsB, 30.3 kDa) and thTAM-11 (strain thTAM overexpressing genes *mdlC* and *mmsB*). (c) Relative transcriptional levels of genes *pyc*, *mdlC*, and *mmsB* in the strain thTAM-12. The  $\beta$ -ACTIN gene was used as the internal control. (d) 3-HP yield by strains thTAM-12 and thTAM-12 with NADH added in shake-flask cultivation. (e) DCW of strains thTAM-10, thTAM-12, and thTAM-12 with NADH added.

**a**

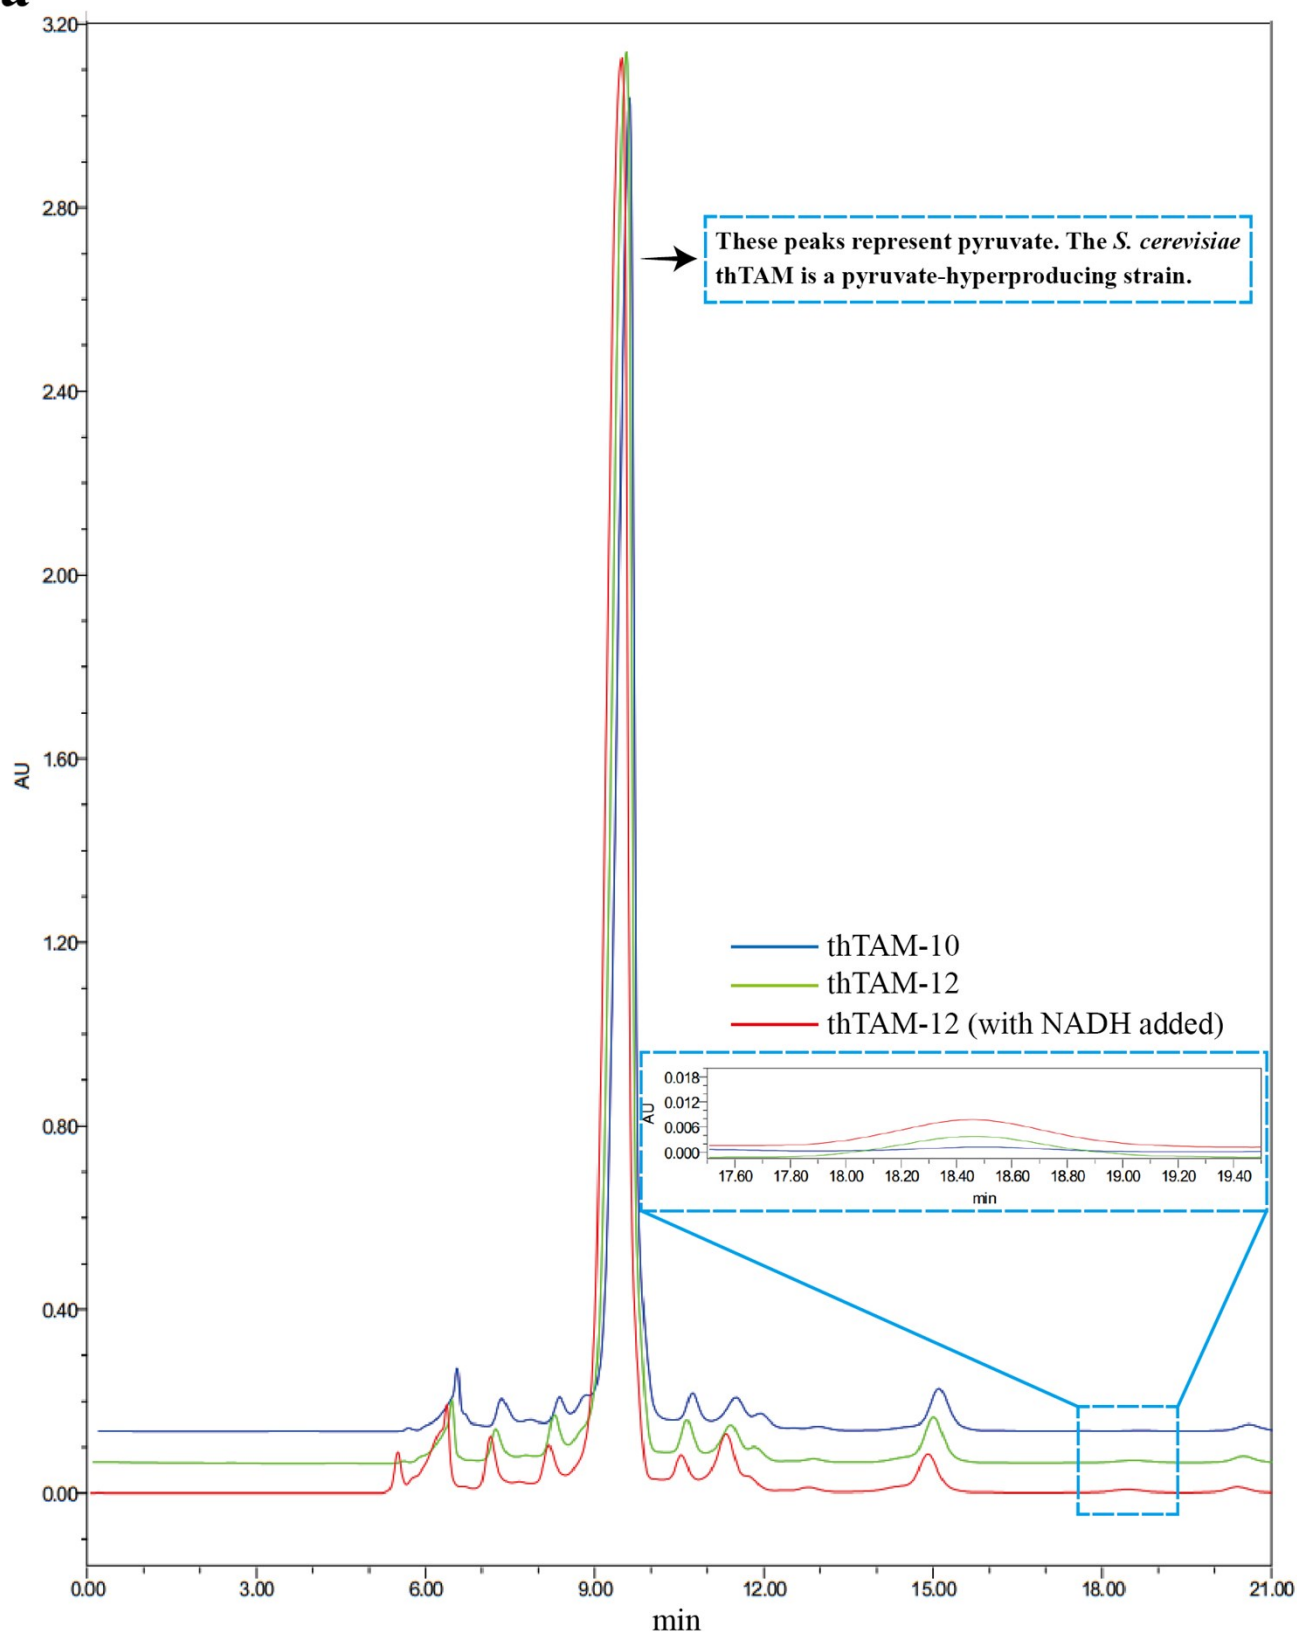

36

37

38

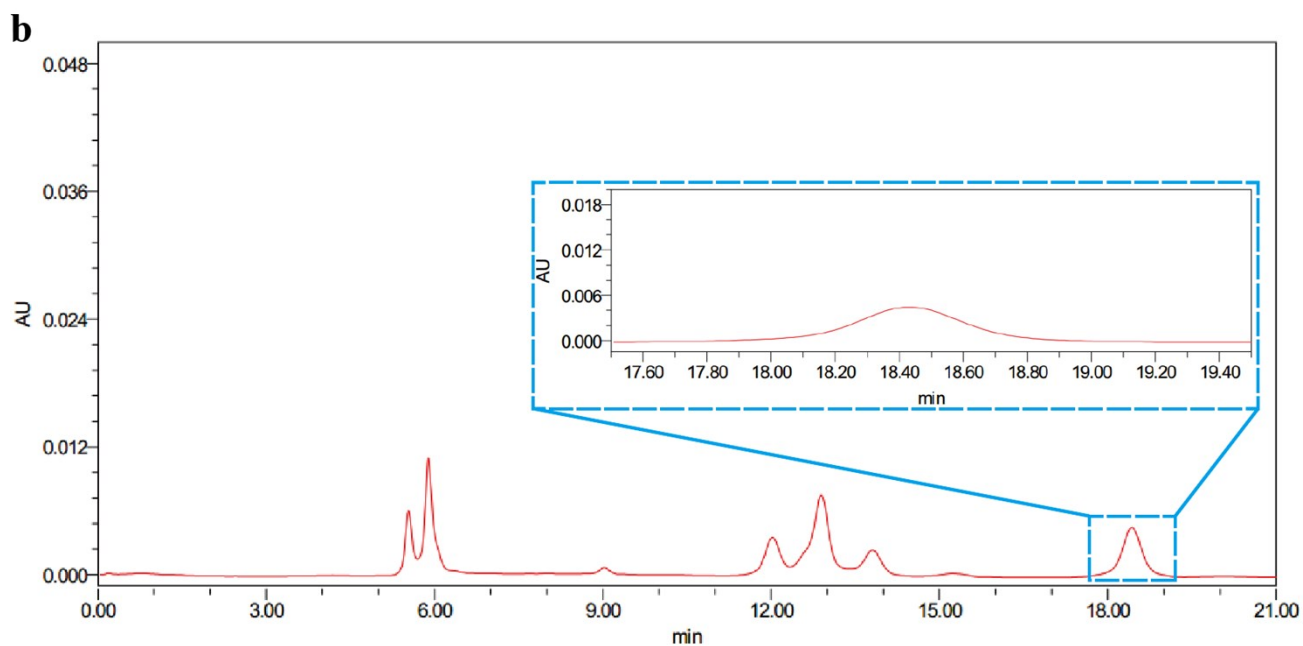

40 **Fig. 2. (a)** 3-HP production analysis by HPLC in shake-flask cultivation at 108 h. Peaks with retention times of 18.43  
41 min represent 3-HP. **(b)** Red solid lines represent 1g/L 3-HP (> 95%) analysis by HPLC. Peaks with retention times  
42 of 18.43 min represent 3-HP.

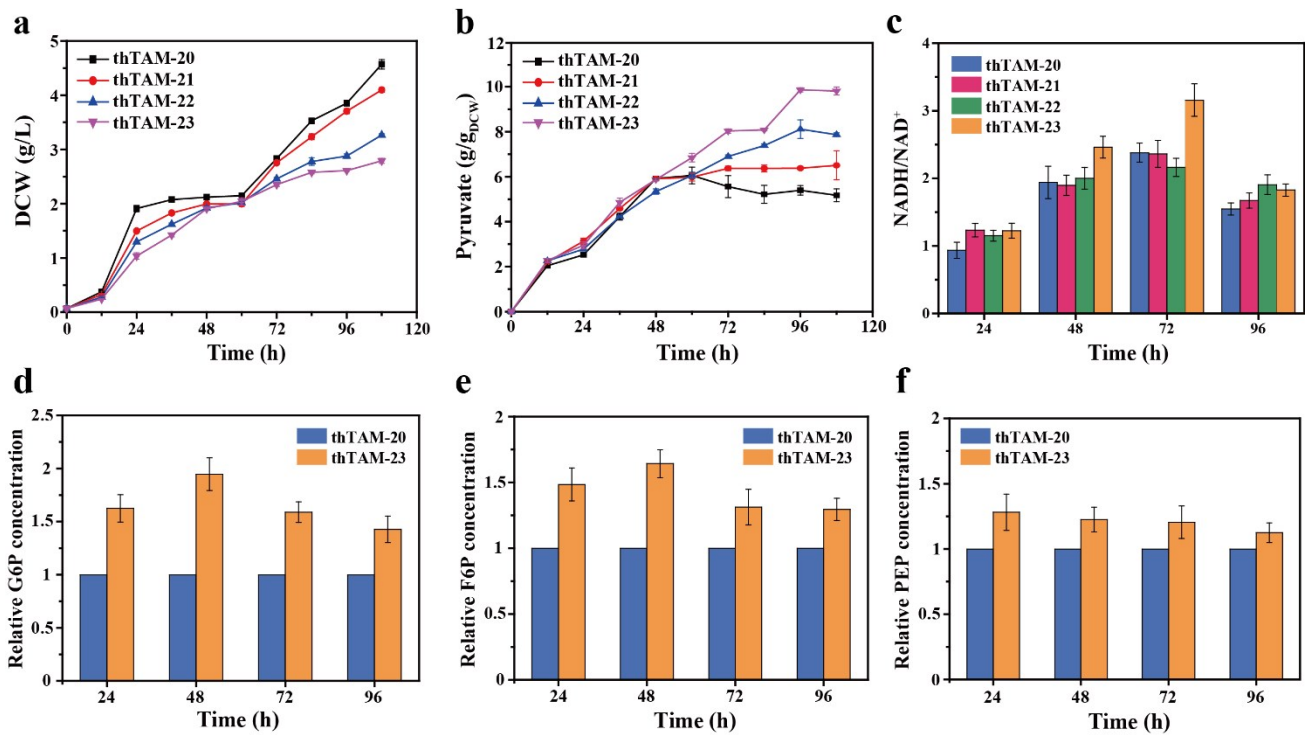

**Fig. 3.** (a) Dry cell weight (DCW) of strains thTAM-20, thTAM-21, thTAM-22, and thTAM-23 in shake-flask cultivation. (b) Pyruvate yield of the four strains in shake-flask cultivation. (c) Ratio of intracellular NADH/NAD<sup>+</sup> in the four strains. (d) Relative intracellular concentration of glucose-6-phosphate (G6P) in strain thTAM-20 and thTAM-23. (e) Relative intracellular concentration of fructose-6-phosphate (F6P) in strain thTAM-20 and thTAM-23. (f) Relative intracellular concentration of phosphoenolpyruvate (PEP) in strain thTAM-20 and thTAM-23.

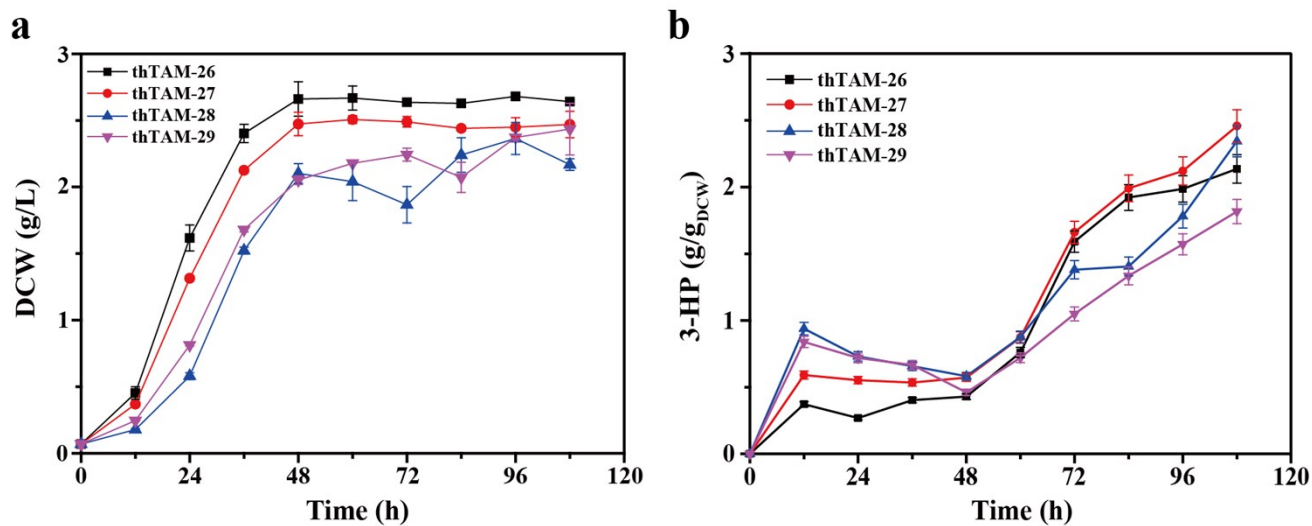

**Fig. 4.** (a) DCW of strains thTAM-26, thTAM-27, thTAM-28, and thTAM-29 in shake-flask cultivation. (b) 3-HP yield by strains thTAM-26, thTAM-27, thTAM-28, and thTAM-29 in shake-flask cultivation.

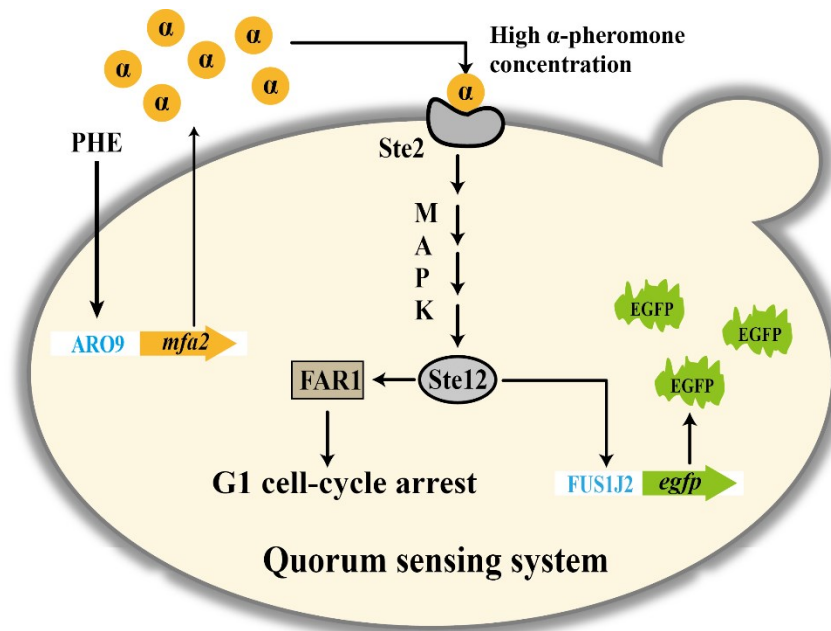

85

86 **Fig. 5.** Schematic diagram of phenylalanine (PHE) responsive the quorum-sensing circuit. This circuit was  
 87 constructed in a *bar1* ( $\alpha$ -pheromone protease gene) deletion genetic background, which is required to avoid signal  
 88 degradation. The *ARO9* promoter is PHE responsive promoter, and controls the expression of the  $\alpha$ -pheromone gene  
 89 *mfa2*. When cells grow to a high population density, the extracellular  $\alpha$ -pheromone binds to mating-type-specific  
 90 membrane receptors Ste2 at a threshold concentration to trigger the FAR1 protein and the *FUS1J2* promoter via the  
 91 intracellular MAPK signaling cascade, causing cells to arrest growth in the G1 phase of the cell cycle and the EGFP  
 92 reporter expression.

93

94

95

96

97

98

99

100 To test the validity of the *ARO9* promoter in strain thTAM, strain thTAM-34 (harboring the plasmid  
 101 YEplac112-pARO9-EGFP) was produced and grown with 0, 100, 200, 300, and 400  $\mu\text{g/mL}$  of PHE, respectively,  
 102 we found that 100  $\mu\text{g/mL}$  of PHE could activate the *ARO9* promoter to express the EGFP.

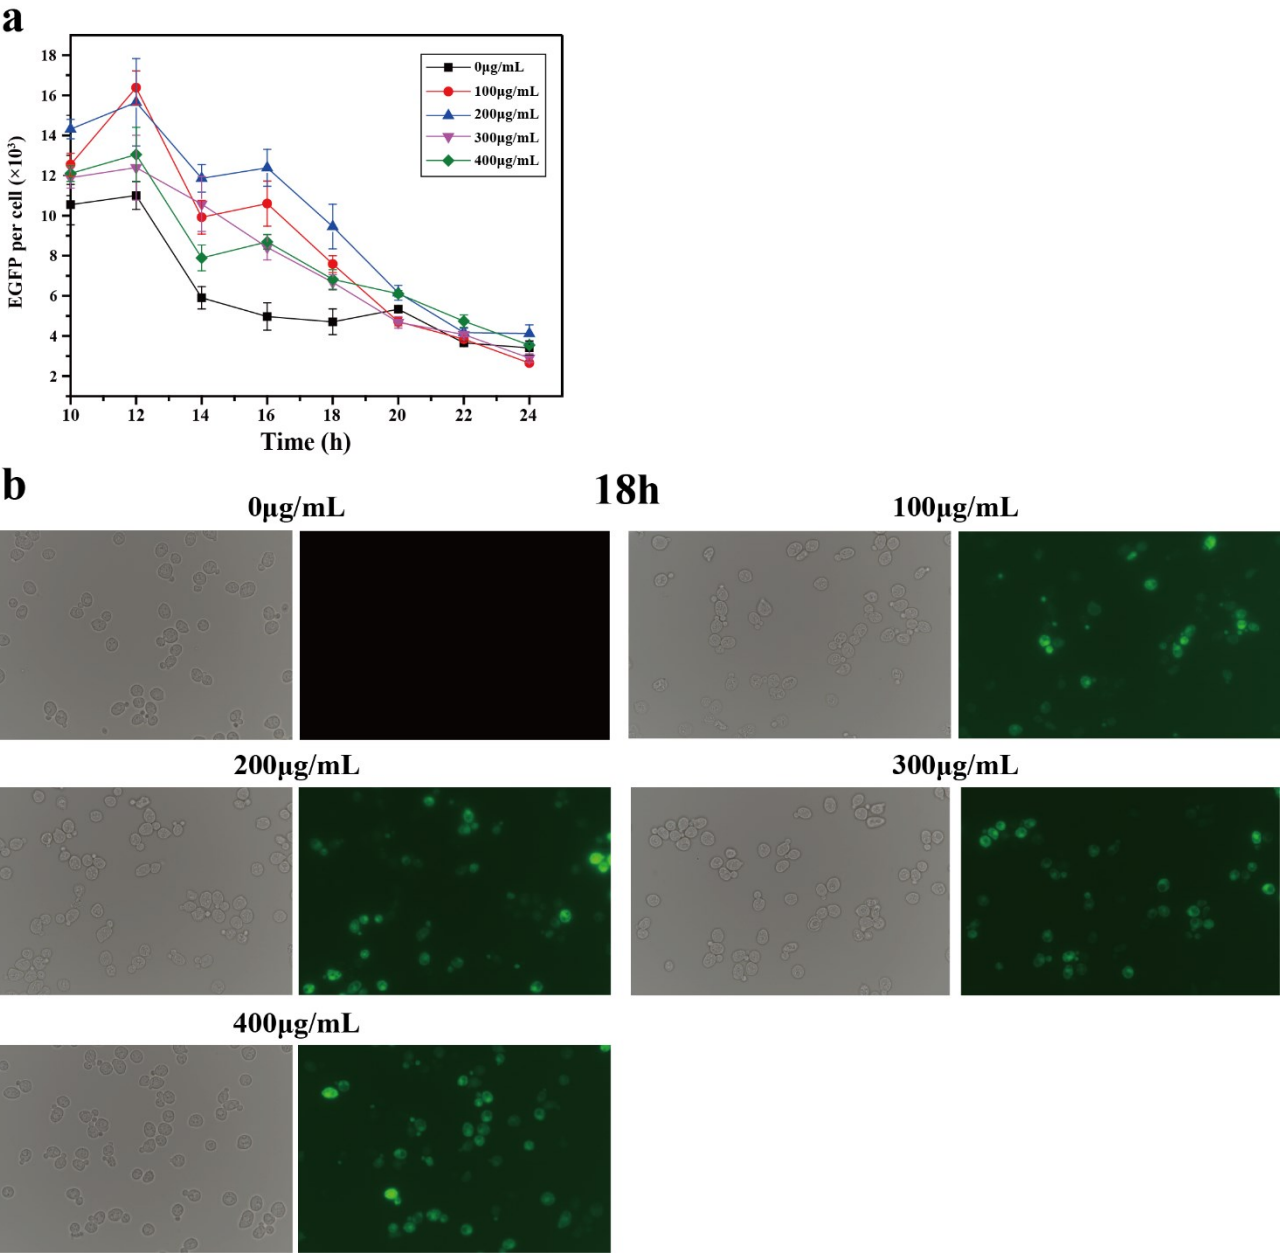

104 **Fig. 6. (a)** EGFP per cell of strain thTAM-34 in medium with different concentrations of PHE during 10 h to 24 h.  
 105 **(b)** Light microscopy images of cell morphology and fluorescence microscope images of the EGFP expression of  
 106 strain thTAM-34 after add various concentrations of PHE at 18 h.



Strain thTAM-35 (harboring the plasmid YEplac112-pFUS1J2-EGFP) was used to detect the availability of the *FUS1J2* promoter. The  $\alpha$ -pheromone with concentrations of 0, 1, 2.5, 5, 10, and 25  $\mu\text{mol/L}$  were respectively added when strain thTAM-35 was growing to the mid-logarithmic phase (at 20 h) to induce the EGFP expression. The observed results indicated that 1  $\mu\text{mol/L}$  of  $\alpha$ -pheromone could activate the *FUS1J2* promoter to express the EGFP.

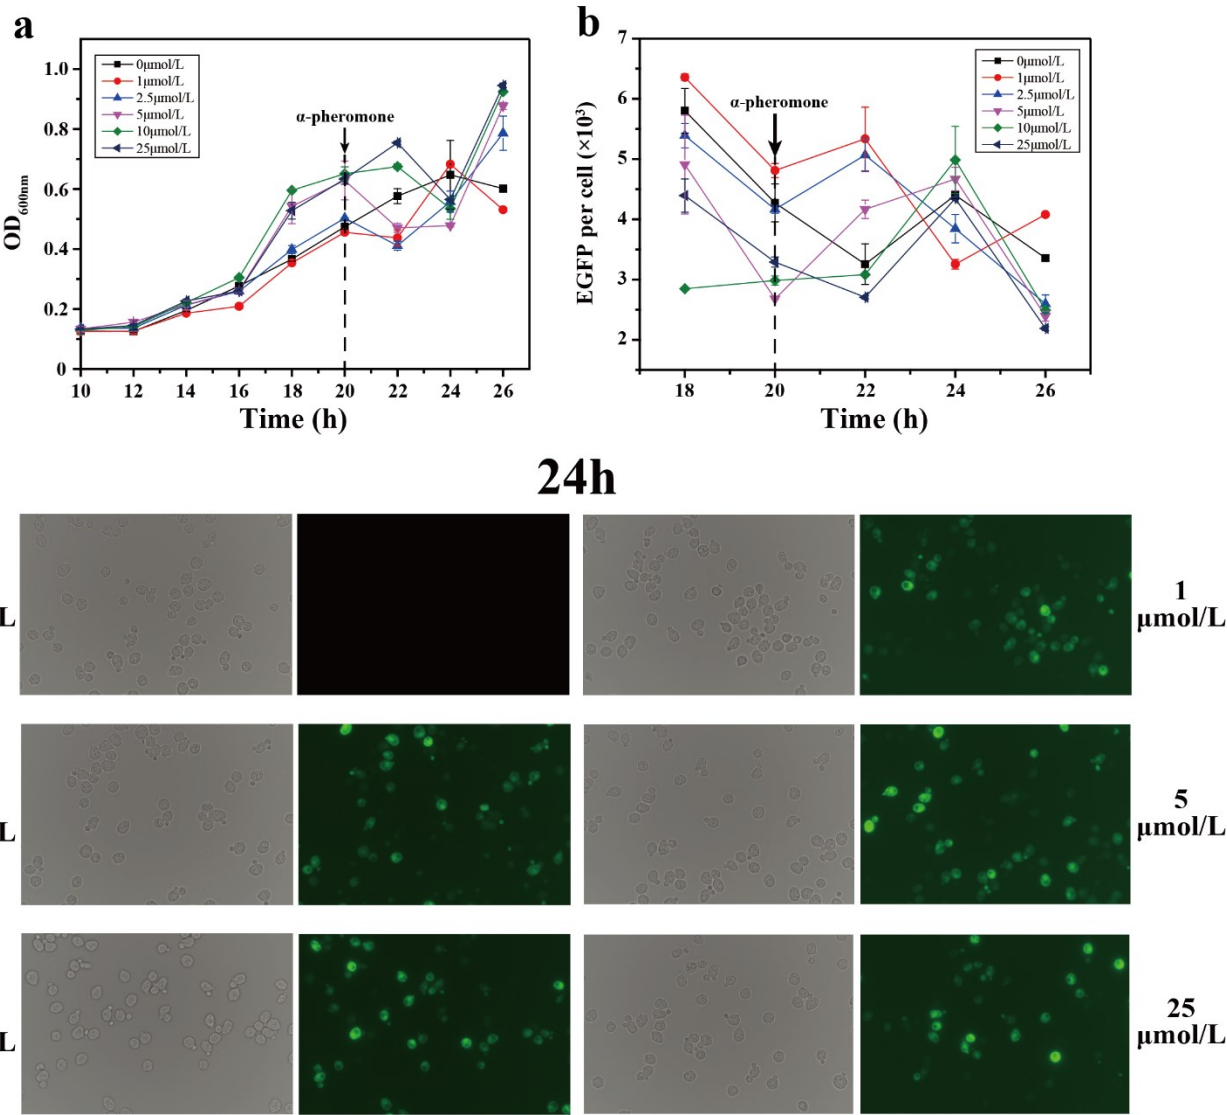

**Fig. 7.** (a) OD<sub>600nm</sub> of strain thTAM-35 in medium that add different concentrations of  $\alpha$ -pheromone at 20 h. (b) EGFP per cell of strain thTAM-35 in medium with different concentrations of  $\alpha$ -pheromone during 18 h to 26 h. (c) Light microscopy images of cell morphology and fluorescence microscope images of the EGFP expression of the strain thTAM-35 at 24 h.

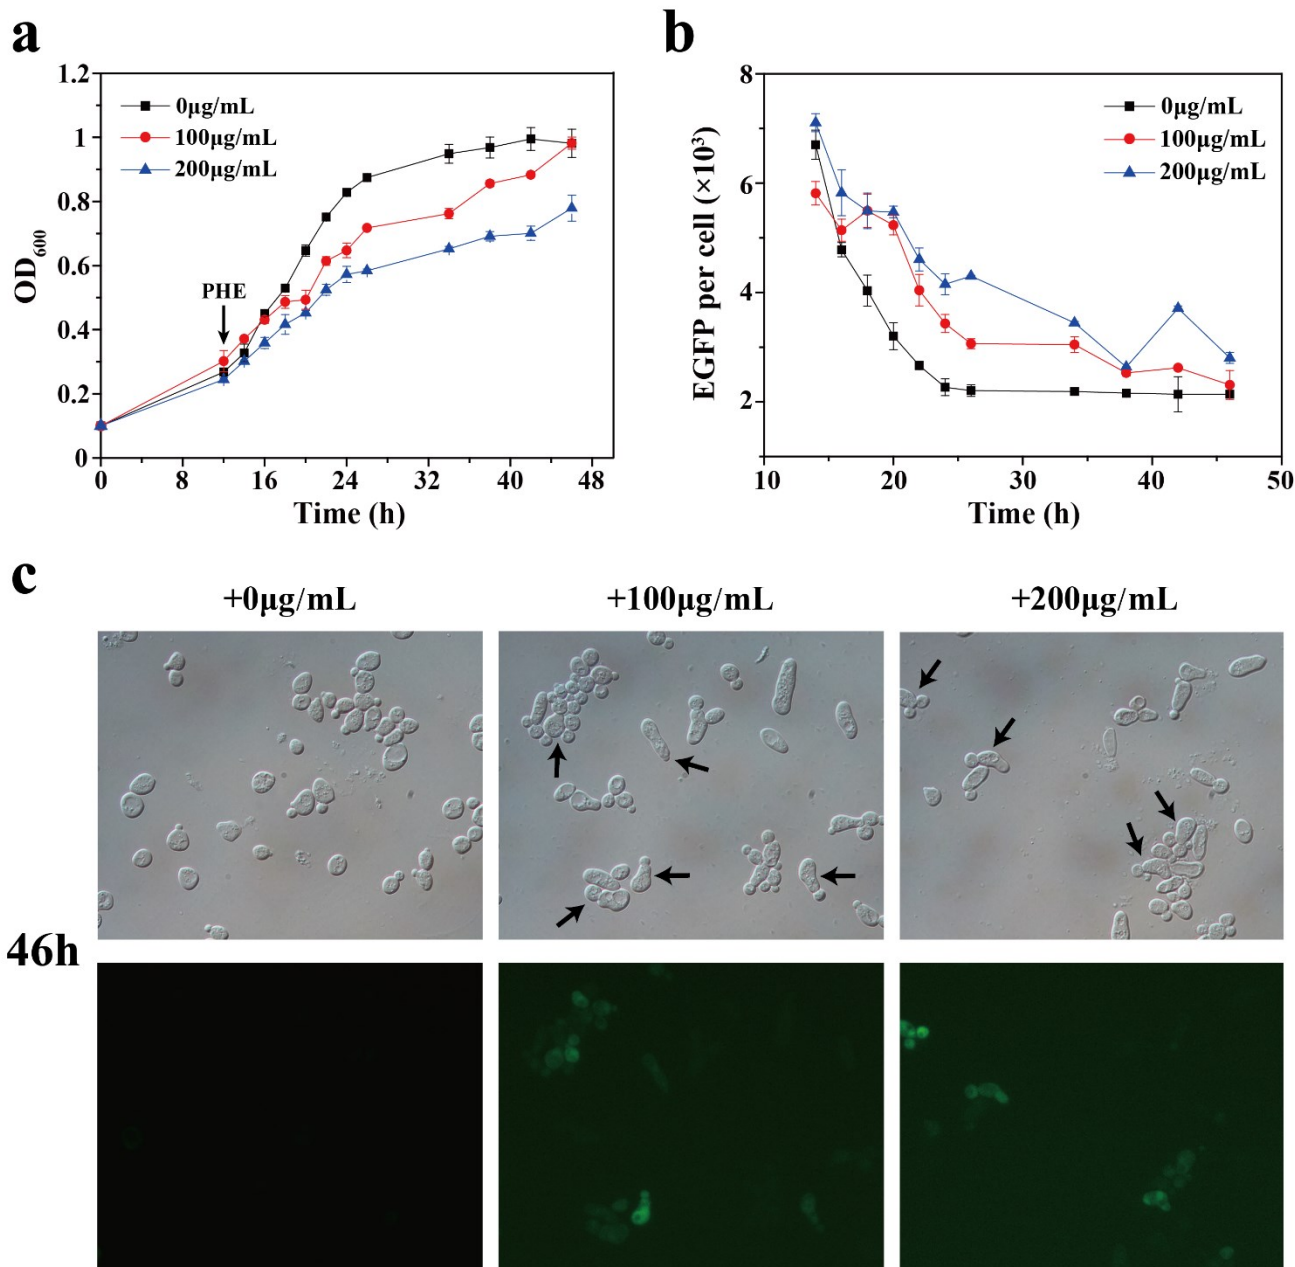

118

119 **Fig. 8.** (a) Growth of strain thTAM-36-1 in medium with different concentrations of PHE. (b) EGFP per cell of strain  
 120 thTAM-36-1 in medium with different concentrations of PHE during 12 h to 46 h. (c) Light microscopy images of  
 121 “shmoo” cell morphology (black arrow mark) and fluorescence microscope images of the EGFP expression of strain  
 122 thTAM-36-1 after the QS system was fully activated at 46 h. Simultaneously, the cells mated, as determined by a  
 123 pear shaped “shmoo” cell morphology.

124

125

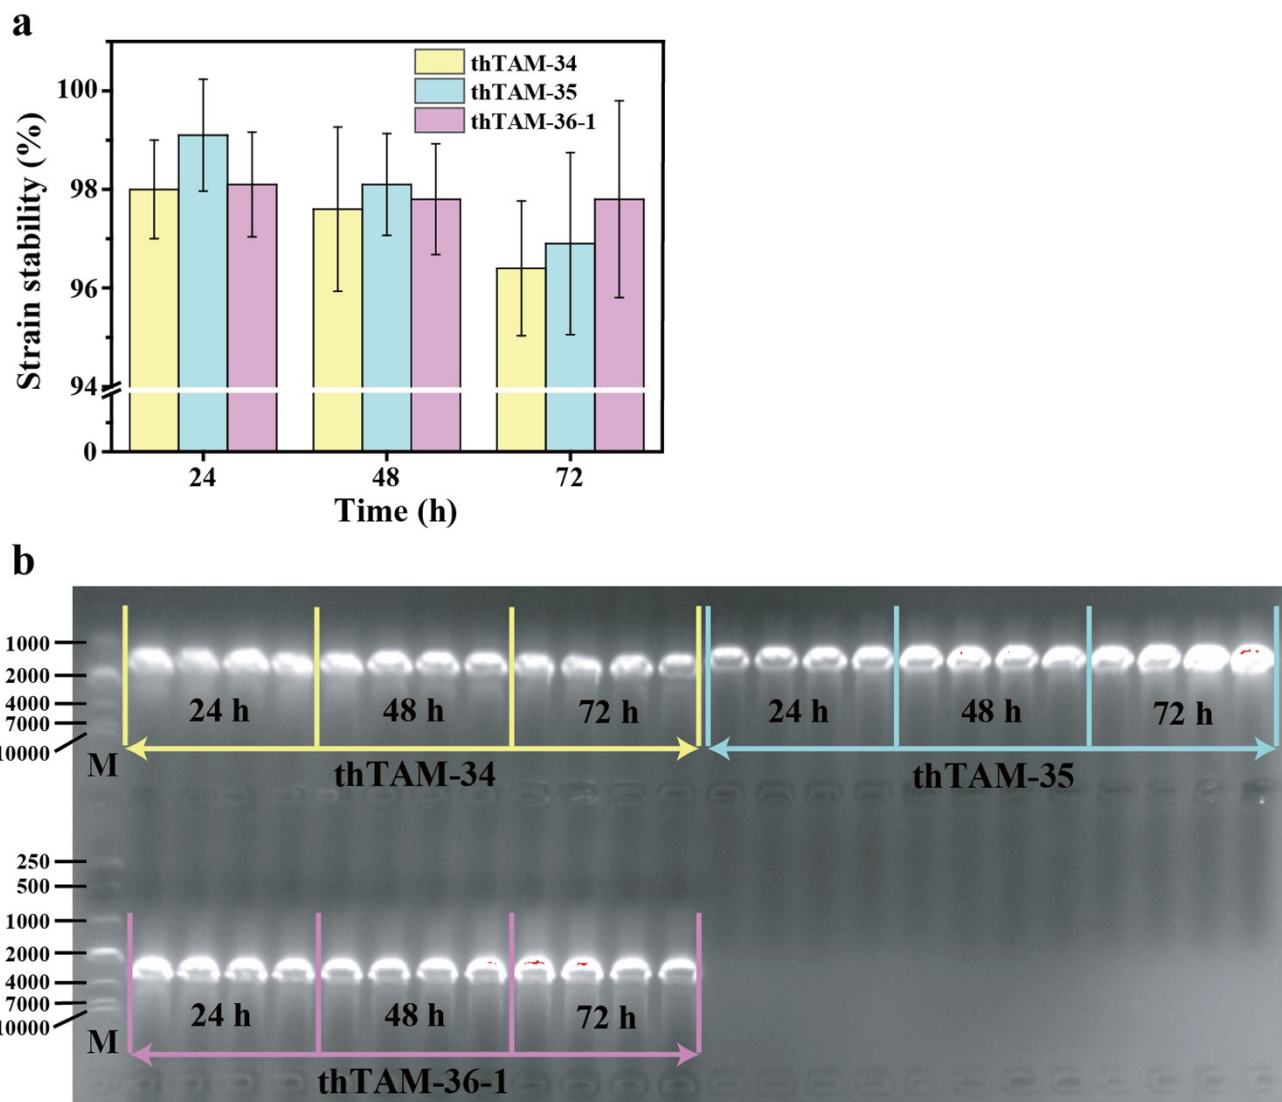

**Fig. 9. (a)** Analysis of strain stability by colony count of strains thTAM-34, thTAM-35, and thTAM-36-1 within different cultivation time. **(b)** Gel image of PCR product amplified using plasmids DNA extracted from four randomly picked single colony of strains thTAM-34, thTAM-35, and thTAM-36-1 within different cultivation time as a template. The lengths of corresponding DNA fragment are 1574 bp (yellow area), 1360 bp (blue area), and 2723 bp (purple area), respectively. M, represents DNA Marker (DL 10,000 DNA Marker, Takara Bio).

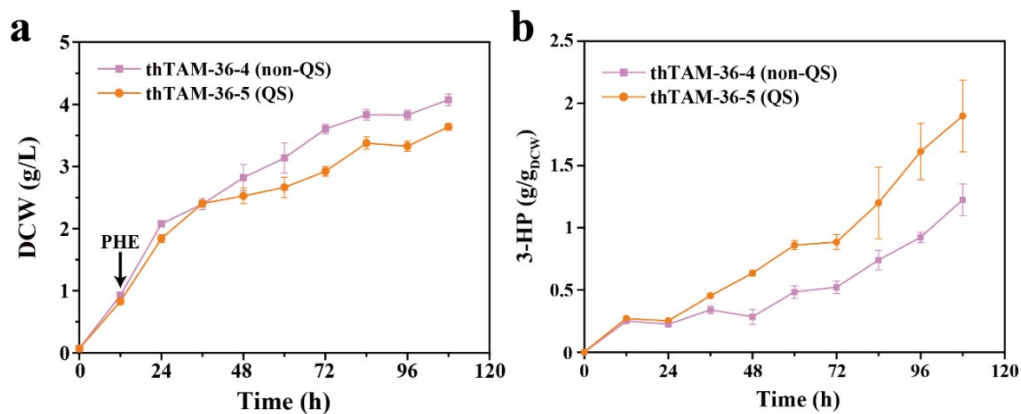

**Fig. 10.** (a) DCW of strains thTAM-36-4 (non-QS) and thTAM-36-5 (QS) in shake-flask cultivation. (b) 3-HP yield by strains thTAM-36-4 (non-QS) and thTAM-36-5 (QS) in shake-flask cultivation.

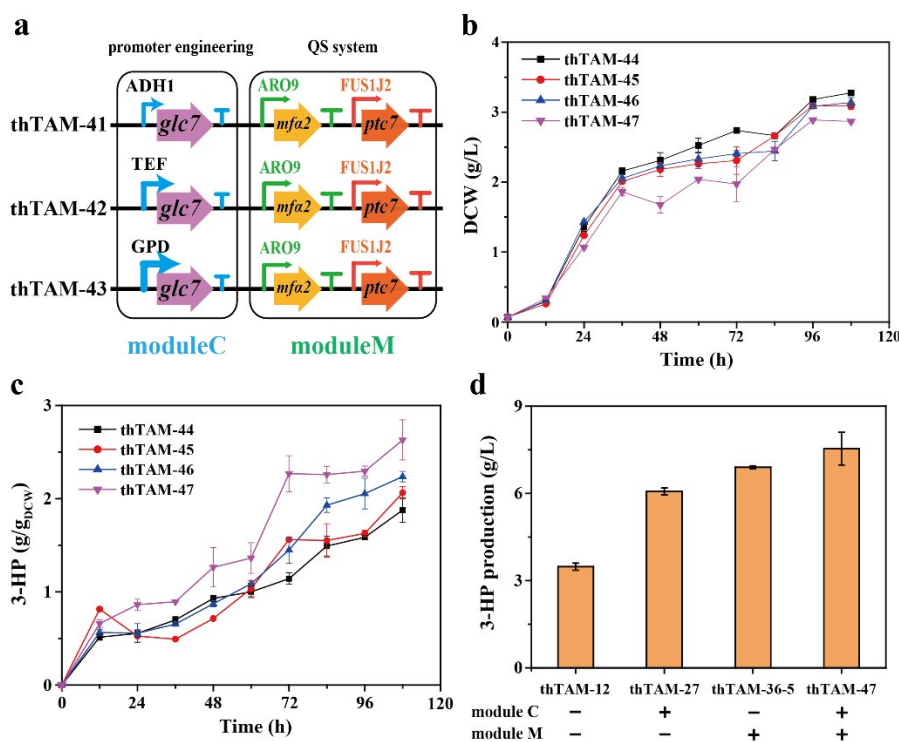

**Fig. 11.** (a) Dynamic dephosphorylation regulation was achieved through the assembly of *glc7* and *ptc7* expression cassettes. Module C, cytoplasmic energy module; module M, mitochondria energy module. (b) DCW of strains thTAM-44, thTAM-45, thTAM-46, and thTAM-47 in shake-flask cultivation. (c) 3-HP yield by strains thTAM-44, thTAM-45, thTAM-46, and thTAM-47 in shake-flask cultivation. (d) 3-HP production comparison for strains thTAM-12, thTAM-27, thTAM-36-5, and thTAM-47.

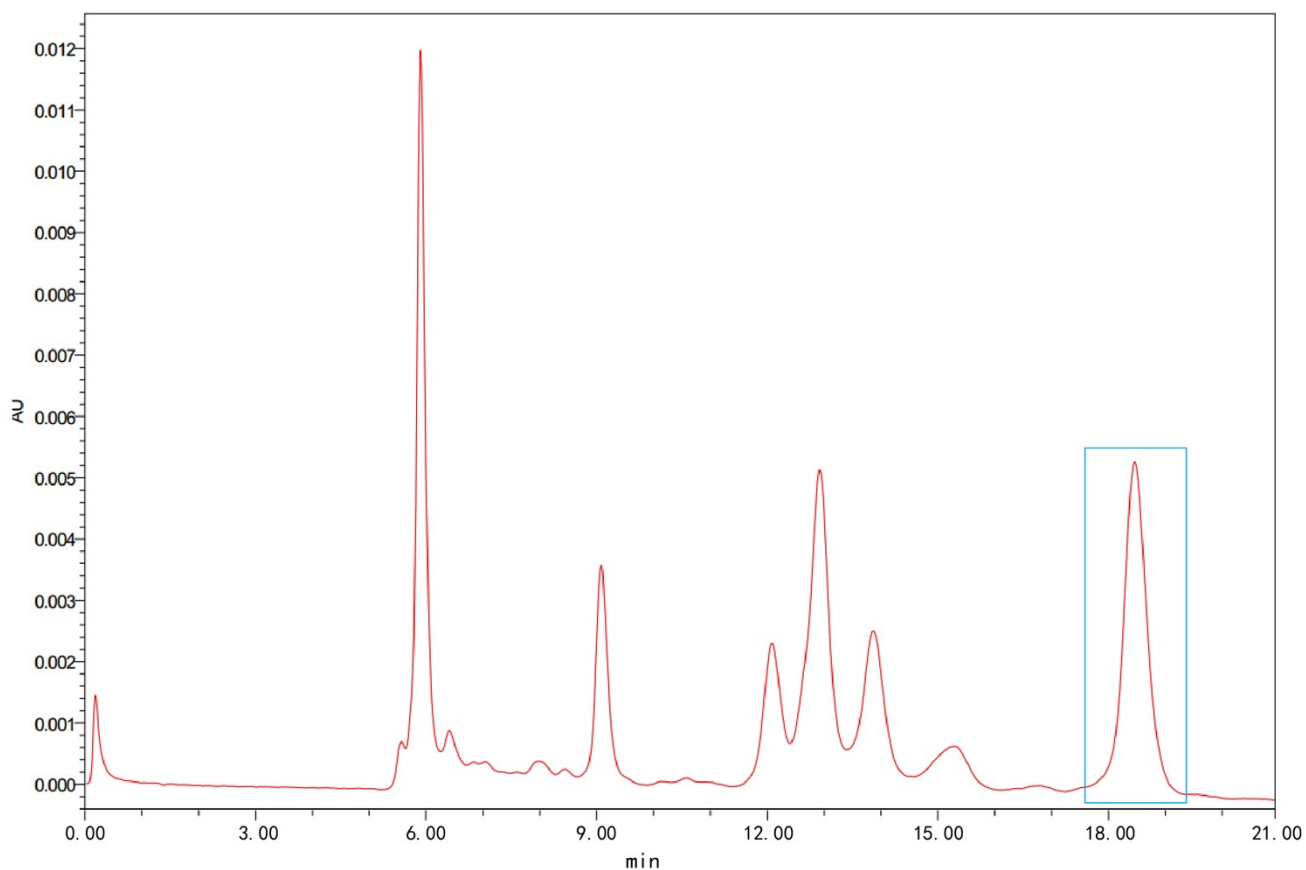

**Fig. 12.** Yield analysis of 3-HP isolated from fermentation broth by HPLC after 500-fold dilution. Peaks with retention times of 18.43 min represent 1.195 g/L 3-HP.

**Table 1.** Strains used in this study

| Strains                  | Description                                                                                                                                                                                     | Source         |
|--------------------------|-------------------------------------------------------------------------------------------------------------------------------------------------------------------------------------------------|----------------|
| <i>E. coli</i> BL21(DE3) | For enzyme expression and purification                                                                                                                                                          | Novagen        |
| BL21-1                   | <i>E. coli</i> BL21(DE3)+pET28a                                                                                                                                                                 | This study     |
| BL21-2                   | <i>E. coli</i> BL21(DE3)+pET28a/T7- <i>kdcA</i>                                                                                                                                                 | This study     |
| BL21-3                   | <i>E. coli</i> BL21(DE3)+pET28a/T7- <i>mdlC</i>                                                                                                                                                 | This study     |
| BL21-4                   | <i>E. coli</i> BL21(DE3)+pET28a/T7- <i>mmsB</i>                                                                                                                                                 | This study     |
| TAM                      | MTAa <i>pdcl</i> (-6,-2):: <i>loxp</i> <i>pdcs</i> (-6,-2):: <i>loxp</i> <i>pdcs</i> (-6,-2):: <i>loxp</i> <i>ura3</i> -52, C2-independent, glucose-tolerant, and pyruvate-hyperproducing yeast | Lab collection |
| thTAM                    | TAM <i>TRP1</i> :: <i>loxp</i> <i>HIS3</i> :: <i>loxp</i>                                                                                                                                       | This study     |
| thTAM-10                 | thTAM+pY26                                                                                                                                                                                      | This study     |
| thTAM-11                 | thTAM+pY26/TEF- <i>mmsB</i> GPD- <i>mdlC</i>                                                                                                                                                    | This study     |
| thTAM-12                 | thTAM+pY26/TEF- <i>mmsB</i> GPD- <i>mdlC</i> GPD- <i>pyc</i>                                                                                                                                    | This study     |
| thTAM-20                 | thTAM+pY14                                                                                                                                                                                      | This study     |
| thTAM-21                 | thTAM+pY14/ADH1- <i>cdc28</i>                                                                                                                                                                   | This study     |
| thTAM-22                 | thTAM+pY14/ADH1- <i>gcr2</i>                                                                                                                                                                    | This study     |
| thTAM-23                 | thTAM+pY14/ADH1- <i>glc7</i>                                                                                                                                                                    | This study     |
| thTAM-24                 | thTAM+pY26/GPD- <i>hxx2</i>                                                                                                                                                                     | This study     |
| thTAM-25                 | thTAM+pY26/TEF- <i>glc7</i> GPD- <i>hxx2</i>                                                                                                                                                    | This study     |
| thTAM-26                 | thTAM+YEplac112 pY26/TEF- <i>mmsB</i> GPD- <i>mdlC</i> GPD- <i>pyc</i>                                                                                                                          | This study     |
| thTAM-27                 | thTAM+YEplac112/ADH1- <i>glc7</i> pY26/TEF- <i>mmsB</i> GPD- <i>mdlC</i> GPD- <i>pyc</i>                                                                                                        | This study     |
| thTAM-28                 | thTAM+YEplac112/TEF- <i>glc7</i> pY26/TEF- <i>mmsB</i> GPD- <i>mdlC</i> GPD- <i>pyc</i>                                                                                                         | This study     |
| thTAM-29                 | thTAM+YEplac112/GPD- <i>glc7</i> pY26/TEF- <i>mmsB</i> GPD- <i>mdlC</i> GPD- <i>pyc</i>                                                                                                         | This study     |
| thTAM-30                 | thTAM+ YEplac112                                                                                                                                                                                | This study     |
| thTAM-31                 | thTAM+ YEplac112/ADH1- <i>ptc5</i>                                                                                                                                                              | This study     |
| thTAM-32                 | thTAM+ YEplac112/ADH1- <i>ptc7</i>                                                                                                                                                              | This study     |
| thTAM-33                 | thTAM+ YEplac112/ADH1- <i>smk1</i>                                                                                                                                                              | This study     |
| thTAM-34                 | thTAM+YEplac112/ARO9- <i>EGFP</i>                                                                                                                                                               | This study     |
| thTAM-35                 | thTAM+YEplac112/FUS1J2- <i>EGFP</i>                                                                                                                                                             | This study     |
| thTAM-36                 | thTAM <i>bar1Δ</i>                                                                                                                                                                              | This study     |
| thTAM-36-1               | thTAM+YEplac112/ARO9- <i>mfa2</i> FUS1J2- <i>EGFP</i> <i>bar1Δ</i>                                                                                                                              | This study     |
| thTAM-36-2               | thTAM+YEplac112 <i>bar1Δ</i>                                                                                                                                                                    | This study     |
| thTAM-36-3               | thTAM+YEplac112/ARO9- <i>mfa2</i> FUS1J2- <i>ptc7</i> <i>bar1Δ</i>                                                                                                                              | This study     |
| thTAM-36-4               | thTAM+YEplac112 pY26/TEF- <i>mmsB</i> GPD- <i>mdlC</i> GPD- <i>pyc</i> <i>bar1Δ</i>                                                                                                             | This study     |
| thTAM-36-5               | thTAM+YEplac112/ARO9- <i>mfa2</i> FUS1J2- <i>ptc7</i> pY26/TEF- <i>mmsB</i> GPD- <i>mdlC</i> GPD- <i>pyc</i> <i>bar1Δ</i>                                                                       | This study     |
| thTAM-40                 | thTAM+YEplac112 <i>bar1Δ</i>                                                                                                                                                                    | This study     |
| thTAM-41                 | thTAM+YEplac112/ADH1- <i>glc7</i> ARO9- <i>mfa2</i> FUS1J2- <i>ptc7</i> <i>bar1Δ</i>                                                                                                            | This study     |
| thTAM-42                 | thTAM+YEplac112/TEF- <i>glc7</i> ARO9- <i>mfa2</i> FUS1J2- <i>ptc7</i> <i>bar1Δ</i>                                                                                                             | This study     |
| thTAM-43                 | thTAM+YEplac112/GPD- <i>glc7</i> ARO9- <i>mfa2</i> FUS1J2- <i>ptc7</i> <i>bar1Δ</i>                                                                                                             | This study     |
| thTAM-44                 | thTAM+YEplac112 pY26/TEF- <i>mmsB</i> GPD- <i>mdlC</i> GPD- <i>pyc</i> <i>bar1Δ</i>                                                                                                             | This study     |
| thTAM-45                 | thTAM+YEplac112/ADH1- <i>glc7</i> ARO9- <i>mfa2</i> FUS1J2- <i>ptc7</i> pY26/TEF-                                                                                                               | This study     |

|          |                                                                                                                                             |            |
|----------|---------------------------------------------------------------------------------------------------------------------------------------------|------------|
|          | <i>mmsB</i> GPD- <i>mdlC</i> GPD- <i>pyc</i> <i>bar1</i> Δ                                                                                  |            |
| thTAM-46 | thTAM+YEplac112/TEF- <i>glc7</i> ARO9- <i>mfa2</i> FUS1J2- <i>ptc7</i> pY26/TEF- <i>mmsB</i> GPD- <i>mdlC</i> GPD- <i>pyc</i> <i>bar1</i> Δ | This study |
| thTAM-47 | thTAM+YEplac112/GPD- <i>glc7</i> ARO9- <i>mfa2</i> FUS1J2- <i>ptc7</i> pY26/TEF- <i>mmsB</i> GPD- <i>mdlC</i> GPD- <i>pyc</i> <i>bar1</i> Δ | This study |

160

161

162

163

164

165

166

167

168

169

170

171

172

173

174

175

176

177

178

179

180

181

182

183

184

185

**Table 2.** Plasmids constructed in this study

| Plasmids                                                             | Description                                                                                        | Source     |
|----------------------------------------------------------------------|----------------------------------------------------------------------------------------------------|------------|
| YEplac112                                                            | Amp, TRP1, 2μ ori                                                                                  | YouBio     |
| pY14                                                                 | Amp, TRP1, CEN/ARS                                                                                 | Turbo      |
| pY26                                                                 | URA3, 2μ ori                                                                                       | Turbo      |
| pML104                                                               | Amp, URA3, 2μ ori                                                                                  | Turbo      |
| pY26/TEF- <i>mmsB</i> GPD- <i>mdlC</i>                               | URA3, 2μ ori, P <sub>TEF</sub> , GPD, overexpression <i>mmsB</i> , <i>mdlC</i>                     | This study |
| pY26/TEF- <i>mmsB</i> GPD- <i>mdlC</i><br>GPD- <i>pyc</i>            | URA3, 2μ ori, P <sub>TEF</sub> , GPD, overexpression <i>mmsB</i> , <i>mdlC</i> , <i>pyc</i>        | This study |
| pY26/GPD- <i>hxx2</i>                                                | URA3, 2μ ori, P <sub>GPD</sub> , overexpression <i>hxx2</i>                                        | This study |
| pY26/TEF- <i>glc7</i> GPD- <i>hxx2</i>                               | URA3, 2μ ori, P <sub>TEF</sub> , GPD, overexpression <i>glc7</i> , <i>hxx2</i>                     | This study |
| pY14/ADH1- <i>glc7</i>                                               | TRP1, CEN/ARS, P <sub>ADH1</sub> , overexpression <i>glc7</i>                                      | This study |
| pY14/ADH1- <i>cdc28</i>                                              | TRP1, CEN/ARS, P <sub>ADH1</sub> , overexpression <i>cdc28</i>                                     | This study |
| pY14/ADH1- <i>gcr2</i>                                               | TRP1, CEN/ARS, P <sub>ADH1</sub> , overexpression <i>gcr2</i>                                      | This study |
| YEplac112/ADH1- <i>glc7</i>                                          | TRP1, 2μ ori, P <sub>ADH1</sub> , overexpression <i>glc7</i>                                       | This study |
| YEplac112/TEF- <i>glc7</i>                                           | TRP1, 2μ ori, P <sub>TEF</sub> , overexpression <i>glc7</i>                                        | This study |
| YEplac112/GPD- <i>glc7</i>                                           | TRP1, 2μ ori, P <sub>GPD</sub> , overexpression <i>glc7</i>                                        | This study |
| YEplac112/ADH1- <i>ptc5</i>                                          | URA3, 2μ ori, P <sub>GPD</sub> , overexpression <i>ptc5</i>                                        | This study |
| YEplac112/ADH1- <i>ptc7</i>                                          | URA3, 2μ ori, P <sub>GPD</sub> , overexpression <i>ptc7</i>                                        | This study |
| YEplac112/ADH1- <i>smk1</i>                                          | URA3, 2μ ori, P <sub>GPD</sub> , overexpression <i>smk1</i>                                        | This study |
| pML104-N20( <i>bar1</i> )                                            | Amp, URA3, 2μ ori, P <sub>TDH3</sub> , SNR52, expression <i>Cas9</i> , <i>gRNA</i>                 | This study |
| YEplac112/ARO9-EGFP                                                  | TRP1, 2μ ori, P <sub>ARO9</sub> , expression <i>egfp</i>                                           | This study |
| YEplac112/FUS1J2-EGFP                                                | TRP1, 2μ ori, P <sub>FUS1J2</sub> , expression <i>egfp</i>                                         | This study |
| YEplac112/ARO9- <i>mfa2</i><br>FUS1J2-EGFP                           | TRP1, 2μ ori, P <sub>ARO9</sub> , FUS1J2, expression <i>mfa2</i> , <i>egfp</i>                     | This study |
| YEplac112/ARO9- <i>mfa2</i><br>FUS1J2- <i>ptc7</i>                   | TRP1, 2μ ori, P <sub>ARO9</sub> , FUS1J2, expression <i>mfa2</i> , <i>ptc7</i>                     | This study |
| YEplac112/ADH1- <i>glc7</i><br>ARO9- <i>mfa2</i> FUS1J2- <i>ptc7</i> | TRP1, 2μ ori, P <sub>ADH1</sub> , ARO9, FUS1J2, expression <i>glc7</i> , <i>mfa2</i> , <i>ptc7</i> | This study |
| YEplac112/TEF- <i>glc7</i> ARO9-<br><i>mfa2</i> FUS1J2- <i>ptc7</i>  | TRP1, 2μ ori, P <sub>TEF</sub> , ARO9, FUS1J2, expression <i>glc7</i> , <i>mfa2</i> , <i>ptc7</i>  | This study |
| YEplac112/GPD- <i>glc7</i> ARO9-<br><i>mfa2</i> FUS1J2- <i>ptc7</i>  | TRP1, 2μ ori, P <sub>GPD</sub> , ARO9, FUS1J2, expression <i>glc7</i> , <i>mfa2</i> , <i>ptc7</i>  | This study |

187

188

189

190

191

192

193



**Table 3.** Primers used in this study for gene cloning and plasmid construction

| Primer               | Sequence ( 5'→3' )                                         |
|----------------------|------------------------------------------------------------|
| KZ- <i>mmsB</i> -S   | <i>agaattgtaattaagatct</i> AATATCCTTCTTGCGATAACCCTC        |
| KZ- <i>mmsB</i> -A   | <i>tttctagaactagcgcgccgc</i> ATGCGTATCGCATTTCATCGG         |
| KZ- <i>pyc</i> -S    | <i>gacggattctagaactagtggatcc</i> ATGGCGGCTCCGTTTCGTCAGCCTG |
| KZ- <i>pyc</i> -A    | <i>aatgtaagcgtgacataacccggg</i> TTACGCTTTGACGATCTTGCAGACG  |
| KZ- <i>mdlC</i> -S   | <i>ccccgggctgcaggaattc</i> ATGAAGACCGTTCACGGTGC            |
| KZ- <i>mdlC</i> -A   | <i>aggctgacgggtatcgataagctt</i> AATTGGCTCGATGGTCTGAG       |
| KZ-pADH1-S           | <i>cttgcattcctgcaggtcgac</i> ATCCTTTTGTGTTTCCGGGT          |
| KZ-pADH1-A           | <i>ggatgatcat</i> AGTTGATTGTATGCTTGGTATAGCTTG              |
| KZ- <i>cdc28</i> -S  | ATGAGCGGTGAATTAGCAAATTAC                                   |
| KZ- <i>cdc28</i> -A  | TTATGATTCTTGGAAGTAGGGGTGGAT                                |
| KZ- <i>gcr2</i> -S   | ATGCATCACCAAATAAGTTAGAT                                    |
| KZ- <i>gcr2</i> -A   | TCATCTTTGTAAATCCCTTAACATACT                                |
| KZ- <i>glc7</i> -S   | ATGGACTCACAACCAGTTGACGT                                    |
| KZ- <i>glc7</i> -A   | TTTTTCTTTCTACCCCCAGCTTGCCT                                 |
| KZ- <i>ptc5</i> -S   | ATGTCTCCCTTAACTAGAACCGTAGCT                                |
| KZ- <i>ptc5</i> -A   | TCATAATCTAGGTTTTGGCTTTGTT                                  |
| KZ- <i>ptc7</i> -S   | ATGTTTGCAAACGTTGGATTTAGA                                   |
| KZ- <i>ptc7</i> -A   | TTAGTCAACTCTCACGACAACAAC                                   |
| KZ- <i>smk1</i> -S   | ATGAATTGCACACTTACAGATAATACCA                               |
| KZ- <i>smk1</i> -A   | CTATAAAGACGAGGAGGACAAATCGGTTTT                             |
| KZ-pARO9-S           | GTTGCCGCGTGGAGACATC                                        |
| KZ-pARO9-A           | CTGAGTCGATGAGAGAGTGTAATTG                                  |
| KZ- <i>mfa2</i> -S   | ATGAAATTCATTTCTACCTTTCTCAC                                 |
| KZ- <i>mfa2</i> -A   | TCAGTACATTGGTTGGCCTGGCT                                    |
| KZ-pFUS1J2-S         | GCCCTCCTTCAATTTTTCTGG                                      |
| KZ-pFUS1J2-A         | TTTGATTTTCAGAACTTGTGTC                                     |
| N20( <i>bar1</i> )-S | CTAGCTCTAAAACGCGATCCAAGTGTAGCAGAG                          |
| N20( <i>bar1</i> )-A | GATCCTCTGCTACACTTGGATCGCGTTTTAGAGCTAG                      |
| KZ-QCK-S             | ATGAGTCCTTAAGAAGGCCGTTGAA                                  |
| KZ-QCK-A             | ATTGTATAGAATATGAATCATACTA                                  |
| M13R(-48)            | AGCGGATAACAATTTACACAGGA                                    |
| M13F(-47)            | CGCCAGGGTTTTCCAGTCACGAC                                    |
| YZ-PY26-GPD-S        | ACAAGGCAATTGACCCACG                                        |
| YZ-PY26-GPD-A        | ACCGGCCGCAAATTAAAGC                                        |
| YZ-PY26-TEF-S        | ATTTCTGGCAAGGTAGACAAGC                                     |
| YZ-PY26-TEF-A        | TAAAAATTTTTATCACGTTTC                                      |

195 Note: Sequences in blue indicated the homologous sequences.

**Table 4.** Different studies carried out for the production of 3-HP

| Engineered strain    | Biosynthesis pathway     | Carbon source      | Culture conditions                          | Glucose input (g/L) <sup>a</sup> | 3-HP output (g/L) <sup>b</sup> | 3-HP yield (g/g) <sup>c</sup> | 3-HP productivity (g/L/h) | Ref |
|----------------------|--------------------------|--------------------|---------------------------------------------|----------------------------------|--------------------------------|-------------------------------|---------------------------|-----|
| <i>E. coli</i>       | Malonyl-CoA pathway      | Glucose            | Shake flask culture (10 mL in 250 mL flask) | / <sup>d</sup>                   | 0.2                            | /                             | 0.01                      | 1   |
|                      |                          |                    | Fed-batch, 5L bioreactor                    | /                                | 40.6                           | 0.19                          | 0.56                      | 2   |
|                      |                          |                    | Fed-batch, 5L bioreactor                    | /                                | 10.08                          | /                             | 0.28                      | 3   |
|                      |                          |                    | Fed-batch, bioreactor                       | /                                | 48.4                           | 0.53                          | 0.23                      | 4   |
|                      |                          | Glucose + malonate | Shake flask culture (50 mL in 250 mL flask) | /                                | 1.20                           | /                             | /                         | 5   |
|                      | Glycerol pathway         | Glucose + glycerol | Fed-batch, 5L bioreactor                    | /                                | 71.9                           | /                             | 1.8                       | 6   |
|                      | $\beta$ -alanine pathway | Glucose            | Fed-batch, 6.6L bioreactor                  | /                                | 31.1                           | 0.423                         | 0.63                      | 7   |
| <i>S. cerevisiae</i> | Malonyl-CoA pathway      | Glucose            | Shake flask culture (20 mL in 100 mL flask) | /                                | 0.463                          | /                             | 0.0064                    | 8   |
|                      |                          |                    | Shake flask culture                         | /                                | 0.477                          | /                             | 0.008                     | 9   |
|                      |                          |                    | Fed-batch, bioreactor                       | /                                | 0.8                            | /                             | 0.03                      | 10  |
|                      |                          |                    | Fed-batch, 1L bioreactor                    | /                                | 9.8                            | 0.07                          | 0.1                       | 11  |
|                      |                          |                    | Fed-batch, 1L bioreactor                    | /                                | 0.279                          | /                             | 0.0056                    | 12  |
|                      | $\beta$ -alanine pathway | Glucose            | Fed-batch, 1L bioreactor                    | /                                | 13.7                           | 0.14                          | 0.17                      | 13  |

|                                   |                      |                  |                          |     |      |       |      |               |
|-----------------------------------|----------------------|------------------|--------------------------|-----|------|-------|------|---------------|
|                                   | Oxaloacetate pathway | Glucose          | Fed-batch, 5L bioreactor | 145 | 18.1 | 0.125 | 0.17 | This study    |
| <i>Schizosaccharomyces pombe</i>  | Malonyl-CoA pathway  | Glucose          | Fed-batch, 1L bioreactor | /   | 11.4 | 0.112 | 0.12 | <sup>14</sup> |
| <i>Corynebacterium glutamicum</i> | Glycerol pathway     | Glucose + xylose | Fed-batch, 5L bioreactor | /   | 62.6 | 0.51  | 0.87 | <sup>15</sup> |

198 Note: <sup>a</sup> The glucose consumption (g/L) in fermentation.

199 <sup>b</sup> The 3-HP production (g/L) in fermentation.

200 <sup>c</sup> The 3-HP yield (g 3-HP/g Glucose).

201 <sup>d</sup> The value could not be calculated from given data.

202

203 **Table 5.** The cost of several reagents needed for the expression in fed-batch fermentation

| Reagent                     | Price (\$/g) | Consumption            | Cost (\$) |
|-----------------------------|--------------|------------------------|-----------|
| Biotin                      | 4.6          | 1.0 mg/L*3 L= 0.003 g  | 0.014     |
| Thiamine                    | 0.27         | 1.6 mg/L*3 L= 0.0048 g | 0.0013    |
| Thiamine diphosphate (ThDP) | 24.5         | 2.0 mg/L*3 L= 0.006 g  | 0.147     |
| Phenylalanine (PHE)         | 0.66         | 100 mg/L*3 L= 0.3 g    | 0.198     |

204 Note: the price of reagent was provided by Sinopharm Chemical Reagent Co., Ltd

205 (<http://www.sinoreagent.com/>) and Sangon Biotech Co., Ltd (<http://www.sangon.com/product>).

206

207

208

209

210

211

## 212 **Supplementary Note 1.**

213 The principle of NADH/NAD<sup>+</sup> and ATP assay

214 NADH/NAD<sup>+</sup> assay:

215 The determination of the total amount of NAD<sup>+</sup> and NADH is based on the oxidation of ethanol  
216 under the action of alcohol dehydrogenase and the reduction of NAD<sup>+</sup> to NADH. The generated NADH  
217 reduces WST-8 to orange yellow formazan under the action of electron coupling agent 1-mPMS. The  
218 maximum absorption peak of formazan is about 450 nm. The formazan produced in the reaction system  
219 is proportional to the total amount of NAD and NADH in the sample. The amount of NADH is  
220 determined by heating the sample in a 60 °C water bath for 30 min, the NAD<sup>+</sup> in the sample is  
221 decomposed and only NADH is retained. NADH reduces WST-8 to formazan, thereby determining  
222 the amount of NADH in the sample by colorimetry. All reagents are provided by the Kit. According  
223 to the total amount of NAD<sup>+</sup> and NADH and the amount of NADH, the NADH/NAD<sup>+</sup> in the sample  
224 can be calculated.

225

226 ATP assay:

227 The determination of ATP is based on the fact that ATP provides energy for firefly luciferase to  
228 catalyze luciferin to produce fluorescence. Results are typically recorded using a luminometer. When  
229 both the firefly luciferase and luciferin are excessive, the intensity of fluorescence is proportional to  
230 the concentration of ATP within a certain concentration range. All reagents are provided by the Kit.  
231 All sample preparation and detection were performed under 4°C environmental condition or on an ice  
232 bed.

233

## 234 **Supplementary Note 2.**

235 The  $\Delta G^0$  (kJ/mol) of functional group transformation using eQuilibrator were presented as follows:

236 Reaction A: pyruvate (-345.8) + CO<sub>2</sub> (-386.0) → oxaloacetate (-714.5)  $\Delta G^0$  (A) = +17.3 kJ/mol

237 Reaction B: oxaloacetate (-714.5) → MSA (-356.6) + CO<sub>2</sub> (-386.0)  $\Delta G^0$  (B) = -28.1 kJ/mol

238 Reaction C: MSA (-356.6) + NADH (-1141.6) → 3-HP (-316.3) + NAD<sup>+</sup> (-1205.8)  $\Delta G^0$  (C) = -23.9

239 kJ/mol

240 Total  $\Delta G^0 = \Delta G^0$  (A) +  $\Delta G^0$  (B) +  $\Delta G^0$  (C) = -34.7 kJ/mol

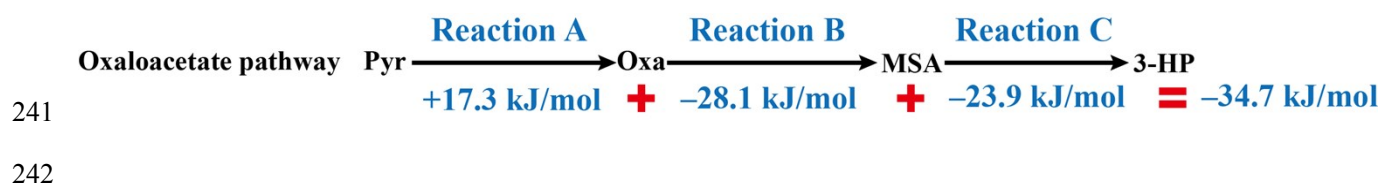

## 243 **Supplementary Note 3.**

244 The optimal stoichiometry for converting glucose to pyruvate is calculated by equation (1). This

245 indicates that the cytoplasmic energy module generates 2 mol ATP.

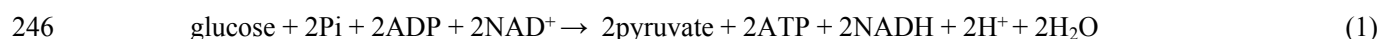

247

248 The optimal stoichiometry for converting pyruvate to 3-HP is calculated by equation (2). This

249 indicates that the 3-HP production module consumes 2 mol ATP.

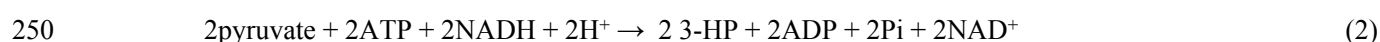

251

252

## 253 **Supplementary Note 4.**

254 The optimal stoichiometry after acetyl-coenzyme (CoA) enters the tricarboxylic acid (TCA) cycle

255 is calculated by equation (3). The stoichiometry of ATP generated by NADH and FADH<sub>2</sub> produced

by the TCA cycle through the oxidative phosphorylation pathway is calculated by equations (4) and (5), respectively. In summary, the stoichiometry of ATP generated by mitochondria energy module can be calculated by equation (6) = 2 \* (3) + 6 \* (4) + 2 \* (5). This indicates that the mitochondria energy module generates 20 mol ATP.

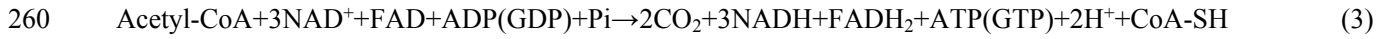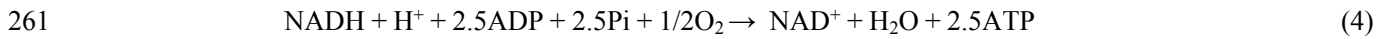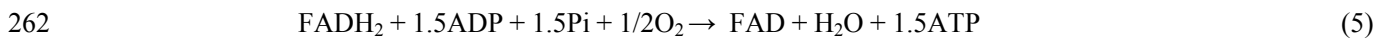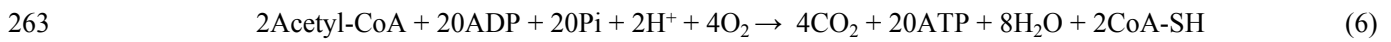

#### Supplementary Note 5.

As shown in Supplementary Fig. 3d-f, the intracellular concentration of glucose-6-phosphate (G6P), fructose-6-phosphate (F6P), and phosphoenolpyruvate (PEP) in strain thTAM-23 was higher than that in the control strain thTAM-20 at 24, 48, 72, and 96 h, respectively. The concentration of G6P at 48 h, F6P at 48 h, and PEP at 24 h in strain thTAM-23 increased by 94.7%, 64.3% and 28.2% compared with that in the control strain thTAM-20, respectively. Furthermore, the whole process of glycolysis accumulates pyruvate and generates additional NADH. Pyruvate yield of strain thTAM-23 was 89.7% higher than that of the control strain thTAM-20 at 108 h (Supplementary Fig. 3b). The [NADH/NAD<sup>+</sup>] of strain thTAM-23 was 31.0%, 26.9%, 32.7%, and 18.1% higher than that of the control strain thTAM-20 at 24, 48, 72, and 96 h, respectively (Supplementary Fig. 3c). These results directly indicated that glycolysis flux was improved through the increase of Hxk2 activity caused by Glc7 dephosphorylation.

278

279

280

## 281 **Supplementary Experimental 1.**

### 282 **Fluorescence assay**

283 Strains thTAM-34, thTAM-35, and thTAM-36-1 were cultured in 250-mL flasks containing 30  
284 mL YNB media to Mid-log phase, and then inoculate into new YNB media (initial  $OD_{600nm} = 0.1$ ). To  
285 assay cell growth and fluorescence intensity, strain thTAM-34 grown with 0, 100, 200, 300, and 400  
286  $\mu\text{g/mL}$  of phenylalanine (PHE). 0, 1, 2.5, 5, 10, and 25  $\mu\text{mol/L}$  of  $\alpha$ -pheromone were respectively  
287 added when strain thTAM-35 was growing to the Mid-log phase (at 20 h), and 0, 100, and 200  $\mu\text{g/mL}$   
288 of PHE were respectively added to the media of strain thTAM-36-1 at 12 h. Fluorescence intensity  
289 assay data were recorded on a SpectraMax M3 plate reader (Molecular Devices) using 96-well plates.  
290 The EGFP intensity was measured at an excitation wavelength of  $480 \pm 5$  nm and an emission  
291 wavelength of  $515 \pm 10$  nm. All fluorescence was normalized with cell density by measuring the  
292 corresponding absorbance at 600 nm. At the same time, fluorescence microscopy images were  
293 obtained with a *Nikon* ECLIPSE 80i microscope equipped with a  $\times 100$  oil immersion objective.  
294 Brightfield images (exposure, 100 ms) and EGFP fluorescence images (FITC, exposure, 500 ms) were  
295 analysed using Image J software. For all microscopy experiments, cell were harvested, washed, and  
296 suspended in PBS.

297

## 298 **Supplementary Experimental 2.**

### 299 **Hexokinase activity assay**

300 Strains thTAM-24 and thTAM-25 were cultured in YNB medium to exponential-phase. Yeast cell  
301 were harvested, washed, resuspended in PBS (pH = 7.4), and subsequently broken by freezingthawing  
302 in liquid nitrogen. Cell extracts were prepared for the determination of Hexokinase activity using  
303 Hexokinase Colorimetric Assay Kit (Sinobestbio, Shanghai, China). The experimental operation steps  
304 were performed according to the instructions. Protein concentrations in cell extracts were determined  
305 by the Bradford Protein Assay Kit (Sangon Biotech, Shanghai, China).

306

### 307 **Supplementary Experimental 3.**

#### 308 **Intracellular concentration of glucose-6-phosphate (G6P), fructose-6-phosphate (F6P), and** 309 **phosphoenolpyruvate (PEP) assay**

310 Intracellular concentration of glucose-6-phosphate (G6P), fructose-6-phosphate (F6P), and  
311 phosphoenolpyruvate (PEP) in strain thTAM-20 and thTAM-23 were determined by the Glucose-6-  
312 Phosphate Assay Kit (MAK014), Fructose-6-Phosphate Assay Kit (MAK020), and PEP  
313 Colorimetric/Fluorometric Assay Kit (MAK102), respectively. All Assay Kits were purchased from  
314 Sigma-Aldrich LLC. Yeast cells were collected and washed (5000 rpm, 5 min) during shake flask  
315 fermentation at 24, 48, 72, and 96 h, respectively. Different from the above-mentioned kit operation  
316 steps, the cell disruption solution is obtained by liquid nitrogen freeze grinding.

317

### 318 **Supplementary Experimental 4.**

#### 319 **Oxygen consumption rate measurements**

320 The oxygen consumption rate (OCR) measurements were carried out as described in previous  
321 reports with minor modifications.<sup>16</sup> Strains thTAM-30, thTAM-31, thTAM-32, and thTAM-33 were



322 respectively cultured overnight in YNB medium until mid-log phase at 30 °C and diluted to OD<sub>600</sub> =  
323 0.3 in fresh YNB medium. In addition, the final concentrations of oligomycin, FCCP and Rotenone &  
324 antimycin A were 15, 5, and 5 μM. The oxygen consumption rate was measured according to the  
325 manufacturer's manual on a Seahorse XF96 Extracellular Flux Analyzer (Seahorse Bioscience,  
326 Billerica, MA). Three wells were used for each strain.

327

## 328 **Supplementary Experimental 5.**

### 329 **Transcriptional analysis**

330 Total RNA was extracted using the RNeasy pure Plant Kit and reverse transcription was carried  
331 out according to the Prime-Script<sup>®</sup> RT reagent kit Perfect Real Time (TaKaRa Biotechnology Co.,  
332 Ltd.). Real-time quantitative PCR (qPCR) was designed as described in previous reports.<sup>17</sup>

333

## 334 **Supplementary Experimental 6.**

335 Branched-chain alpha-keto acid decarboxylase (KdcA, EC:4.1.1.2) and benzoylformate  
336 decarboxylase (MdlC, EC:4.1.1.7) activity were measured by coupling the reduction of aldehydes  
337 catalyzed by alcohol dehydrogenase and one unit of activity was defined as that the oxidation of 1  
338 μmol NADH per minute by measurement of the absorbance at 340 nm. KdcA activity was determined  
339 as previously.<sup>18</sup> The corresponding reaction mixture (200 μL, pH = 6.3, 30 °C) containing 50 mM  
340 sodium citrate (adjust pH = 6.3 with 1 mol/L HCl), 10 mM thiamine diphosphate (ThDP), 10 mM  
341 MgCl<sub>2</sub>, 10 mM NADH, 5 μL ethanol dehydrogenase, 10 mM oxaloacetate, and 50 μL enzyme solution.  
342 MdlC activity was determined according to previously described methods.<sup>19</sup> The corresponding  
343 reaction mixture (200 μL, pH = 6.5, 30 °C) containing 100 mM potassium phosphate buffer, 0.3 mM

344 NADH, 5  $\mu$ L ethanol dehydrogenase, 2 mM oxaloacetate, 10 mM  $MgCl_2$ , 10 mM ThDP, and 50  $\mu$ L  
345 enzyme solution. 3-hydroxyisobutyrate dehydrogenases (MmsB, EC:1.1.1.31) was determined  
346 according to previously reported methods,<sup>20</sup> with minor modification. The corresponding reaction  
347 mixture added 10 mM NADH as cofactor and 1 mM malonate semialdehyde as substrate. Pyc activity  
348 was determined as described.<sup>21</sup> Pyc and MmsB activity was defined as described above. All enzyme  
349 activities were determined on a SpectraMax M3 microplate reader (Molecular Devices, Sunnyvale,  
350 CA).

351

## 352 **Supplementary Experimental 7.**

### 353 **Fed-batch fermentation**

354 Strain thTAM-43 was inoculated in 100 mL YNB medium in a 500 mL shake flask and cultured  
355 at 30 °C with 200 rpm agitation as seed culture. 0.3 L seed culture was centrifuged and suspended in  
356 synthetic medium and then inoculated into the bioreactor. Batch fermentation was carried out in a 5-L  
357 bioreactor (BxBIO, Shanghai, China) containing 2.7 L synthetic medium with an initial  $OD_{600} = 0.3$ .  
358 The working volume was 3.0 liters, and fermentation was performed at 30 °C for 108 h with an  
359 agitation speed of 500 rpm and an aeration rate of 1.5 vvm. The culture pH was maintained at 5.0 by  
360 automatic addition of 6 M KOH. To induce the QS system, PHE with a final concentration of 100  
361  $\mu$ g/mL was added to the fermentation broth at 12 h. For fed-batch cultivations, the 20 g/L glucose was  
362 added after the glucose was exhausted.

363

## 364 **Supplementary Experimental 8.**

### 365 **Isolation of 3-HP from fermentation broth**

Isolation of 3-HP from fermentation broth were performed as described in previous patents<sup>22, 23</sup> with appropriate modifications. The steps and parameters were listed below:

( i ) Centrifugation: yeast biomass was removed from the broth using centrifugation (8000 rpm for 5 min) and then the supernatant was decanted.

( ii ) Decolorization: the supernatant was decolorized by adding activated carbon particles (carbon granularity 80 mesh, 5 g/L, 30 min) and centrifuged (12000 rpm for 5 min). The supernatant was decanted.

( iii ) Acidulation: the protein in the broth was removed by adding concentrated H<sub>2</sub>SO<sub>4</sub> until the pH of the broth solution was 1.25. The precipitated protein was removed using centrifugation (12000 rpm for 8 min) and the supernatant was then decanted.

( iv ) Ion Exchange: the impurity organic acid in acidulated fermentation broth was removed by weak-base anion exchange. The anion exchange resin is D314 Weak-Base Anion Exchange resin available from the ANHUI SANXING RESIN TECHNOLOGY CO., LTD, CHINA. The glass column (25 mm × 600 mm) was obtained from BEIJING SYNTHWARE GLASS, LTD, CHINA.

Resin pretreatment:

(a) The untreated resin was soaked in a saturated NaCl solution for 2 h and gradually diluted to pure water.

(b) Soak the resin in pure water for 12 h, wait until the resin is fully expanded.

(c) Soak the resin in 5.0 wt % HCl for 4 h and rinse with pure water to pH = 4.0.

(d) Soak the resin in 5.0 wt % NaOH and rinse with pure water until pH = 8.5.

Adsorption and elution:

388       The peristaltic pump controled the injection sample flow rate to 3.0 mL/min. Take 2.0 mol/L  
 389       NaOH as the eluent, and the flow rate of eluent was 3.0 mL/min.  
 390       Resin regeneration  
 391       (a) Wash with pure water, then eluted with 5.0 wt % NaOH solution for 2 h.  
 392       (b) Eluted with pure water until pH = 8.5.  
 393       ( v ) Distillation: the material was concentrated with a rotary evaporator for vacuum distillation. The  
 394       temperature was set at 60 °C for 20.0 min.

395

## 396   **References**

- 397   1.       C. Rathnasingh, S. M. Raj, Y. Lee, C. Catherine, S. Ashok and S. Park, *J. Biotechnol.*, 2012, **157**, 633-640.
- 398   2.       C. Liu, Y. Ding, R. Zhang, H. Liu, M. Xian and G. Zhao, *Metab. Eng.*, 2016, **34**, 104-111.
- 399   3.       Z. Cheng, J. Jiang, H. Wu, Z. Li and Q. Ye, *Bioresour. Technol.*, 2016, **200**, 897-904.
- 400   4.       M. D. Lynch, R. T. Gill and T. W. Lipscomb, US Pat., US9388419, 2016.
- 401   5.       B. Liang, G. Sun, Z. Wang, J. Xiao and J. Yang, *Green Chem.*, 2019, **21**, 6103-6115.
- 402   6.       H. S. Chu, Y. S. Kim, C. M. Lee, J. H. Lee, W. S. Jung, J. H. Ahn, S. H. Song, I. S. Choi and K. M. Cho, *Biotechnol.*  
 403       *Bioeng.*, 2015, **112**, 356-364.
- 404   7.       C. W. Song, J. W. Kim, I. J. Cho and S. Y. Lee, *ACS Synth. Biol.*, 2016, **5**, 1256-1263.
- 405   8.       Y. Chen, J. Bao, I. K. Kim, V. Siewers and J. Nielsen, *Metab. Eng.*, 2014, **22**, 104-109.
- 406   9.       X. Chen, X. Yang, Y. Shen, J. Hou and X. Bao, *ACS Synth. Biol.*, 2017, **6**, 905-912.
- 407   10.       F. David, J. Nielsen and V. Siewers, *ACS Synth. Biol.*, 2016, **5**, 224-233.
- 408   11.       K. R. Kildegaard, N. B. Jensen, K. Schneider, E. Czarnotta, E. Ozdemir, T. Klein, J. Maury, B. E. Ebert, H. B.  
 409       Christensen, Y. Chen, I. K. Kim, M. J. Herrgard, L. M. Blank, J. Forster, J. Nielsen and I. Borodina, *Microb. Cell Fact.*,  
 410       2016, **15**, 53-65.
- 411   12.       S. Shi, Y. Chen, V. Siewers and J. Nielsen, *mBio*, 2014, **5**, e01130-01114.
- 412   13.       I. Borodina, K. R. Kildegaard, N. B. Jensen, T. H. Blicher, J. Maury, S. Sherstyk, K. Schneider, P. Lamosa, M. J.  
 413       Herrgard, I. Rosenstand, F. Oberg, J. Forster and J. Nielsen, *Metab. Eng.*, 2015, **27**, 57-64.
- 414   14.       S. Takayama, A. Ozaki, R. Konishi, C. Otomo, M. Kishida, Y. Hirata, T. Matsumoto, T. Tanaka and A. Kondo, *Microb.*  
 415       *Cell Fact.*, 2018, **17**, 176.
- 416   15.       Z. Chen, J. Huang, Y. Wu, W. Wu, Y. Zhang and D. Liu, *Metab. Eng.*, 2017, **39**, 151-158.
- 417   16.       T. Srikumar, M. C. Lewicki, M. Costanzo, J. M. Tkach, H. van Bakel, K. Tsui, E. S. Johnson, G. W. Brown, B. J.  
 418       Andrews, C. Boone, G. Giaever, C. Nislow and B. Raught, *J. Cell Biol.*, 2013, **201**, 145-163.
- 419   17.       X. Chen, G. Xu, N. Xu, W. Zou, P. Zhu, L. Liu and J. Chen, *Metab. Eng.*, 2013, **19**, 10-16.
- 420   18.       B. A. Smit, J. E. T. van Hylckama Vlieg, W. J. M. Engels, L. Meijer, J. T. M. Wouters and G. Smit, *Appl. Environ.*  
 421       *Microbiol.*, 2005, **71**, 303-311.
- 422   19.       M. B. Marc Bruning, Danilo Meyer, Ralph Golbik, Hans Bartunik, Andreas Liese, Kai Tittmann, *Biochem.*, 2009, **48**,

423 3258-3268.  
424 20. T. Yao, L. Xu, H. Ying, H. Huang and M. Yan, *Appl. Biochem. Biotechnol.*, 2009, **160**, 694-703.  
425 21. X. Chen, P. Zhu and L. Liu, *Metab. Eng.*, 2016, **33**, 76-85.  
426 22. T. W. Abraham, E. Allen, J. J. Hahn, P. Tsobanakis, E. C. Bohnert and C. L. Frank, US Pat., US10442748B2, 2019.  
427 23. R. Tengler, D. D. Coster, US Pat., US20130345470A1, 2013.  
428
